# Supplementary material for: Caenorhabditis elegans Deficient in DOT-1.1 Exhibit Increases in H3K9me2 at Enhancer and Certain RNAi-Regulated Regions
Source: MDPI journal article supplement (doi:10.3390/cells9081846), 2020-08-06
Supplement: s1 [file s1]

Supplemental Figures

# ***Caenorhabditis elegans* Deficient in DOT-1.1 Exhibit Increases in H3K9me2 at Enhancers and Certain RNAi-Regulated Regions**

Ruben Esse <sup>1,2</sup> and Alla Grishok <sup>1,\*</sup>

<sup>1</sup> Boston University School of Medicine, Department of Biochemistry, BU Genome Science Institute; Boston, MA 02118, USA; agrishok@bu.edu

<sup>2</sup> Present address: Department of Medical and Molecular Genetics, King's College London, London, SE1 9RT, United Kingdom

\* Correspondence: agrishok@bu.edu

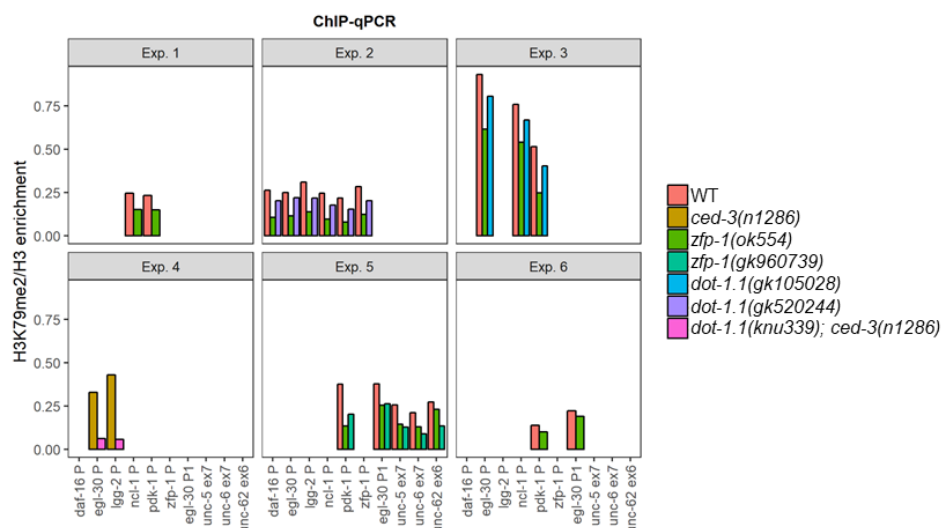

**Figure S1.** H3K79me2 ChIP-qPCR results showing decrease in H3K79me2 in various mutants used in this study. Six independent experiments are shown; the IP efficiency varies between the experiments, which is expected. Tested gene names are shown on the X axes, “P” after the gene name indicating the promoter region and “ex” indicating an exon region. The Y axis shows the ratio between the mean H3K79me2 ChIP-qPCR signal and the mean H3 ChIP-qPCR signal (from three technical replicates). The ChIP signals were computed as a “% of input”. Note the background signal in *dot-1.1(knu339); ced-3(n1286)* in experiment #4, consistent with our published western blot data [1]. The H3K79me2 levels at the *pdh-1* promoter in *zfp-1(ok554)*, which is used for H3K9me2 ChIP-seq here, were assayed in five experiments shown and are ~50% reduced compared to wild type, consistent with our published work [2]. The results with *dot-1.1(gk520244)* and *zfp-1(gk960739)* alleles used in gonad migration experiments are shown in experiment #2 and experiment #5, respectively; note reduced H3K79me2 at the *unc-6* gene in *zfp-1(gk960739)* in experiment #5.

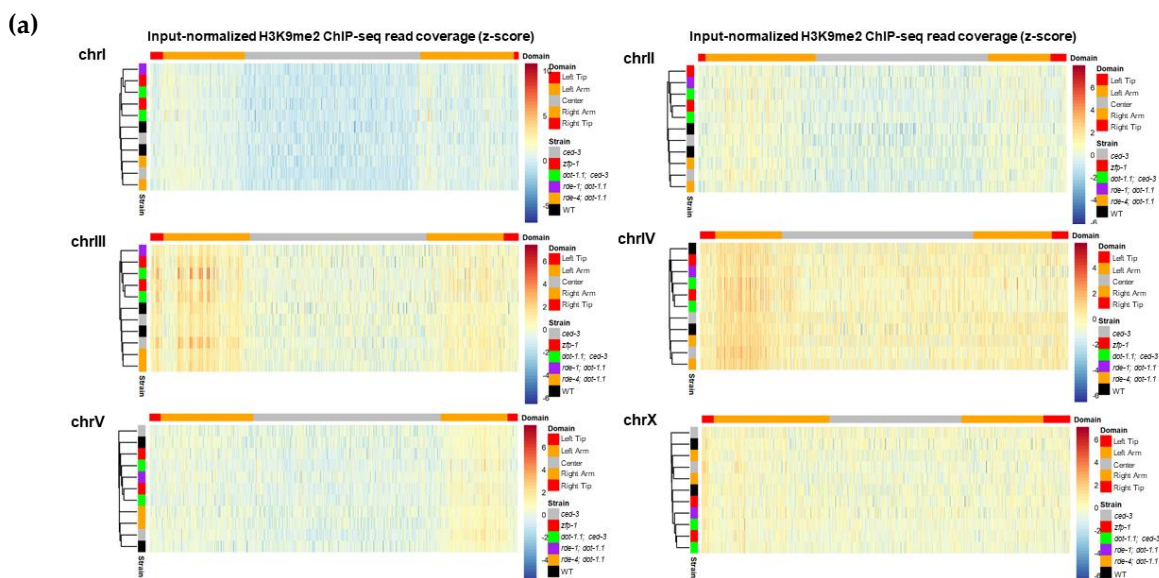

(b)

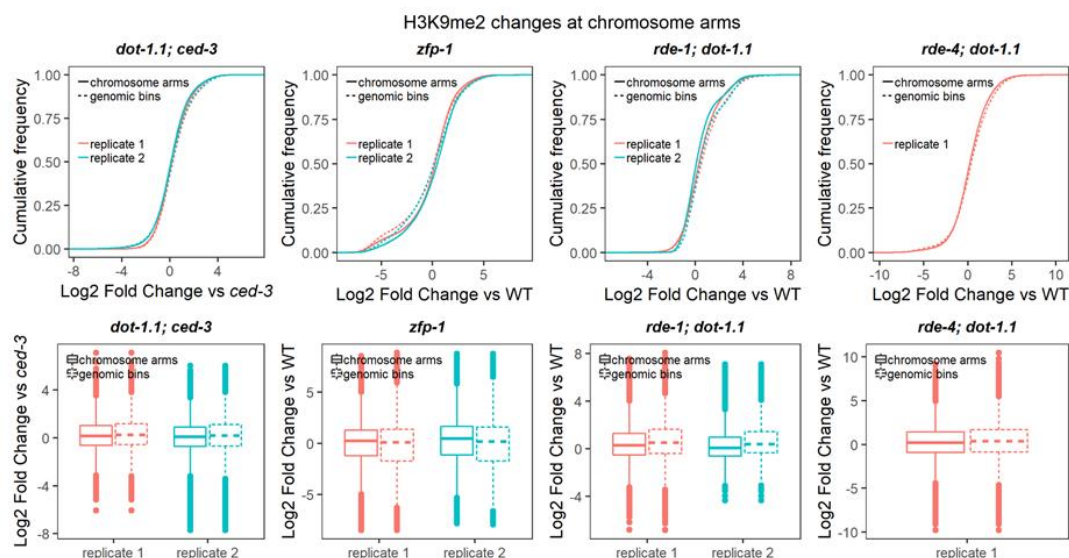

**Figure S2.** Deletion of DOT-1.1 does not disrupt preferential positioning of H3K9me2 at autosome arms. (a) Heatmaps showing coverage of H3K9me2 along the *C. elegans* chromosomes for each mutant analyzed. Input-normalized coverage (see Materials and Methods) was calculated for each of the 10,000 bp bins spanning each chromosome, and each bin was assigned a chromosome domain (chromosome domain coordinates are from [3]). (b) Cumulative distribution of the fold change (log2) of H3K9me2 ChIP-seq RPKM value (input-normalized) at the autosome arms between each mutant replicate and the average value in the corresponding background strain. Two-sample Kolmogorov-Smirnov (for cumulative distribution plots) and Wilcoxon rank sum (for boxplots) tests were performed to compare the cumulative changes between genomic bins located in chromosome arms and those in non-overlapping genomic bins spanning the genome. Statistical significance ( $p$ -values ranging between  $< 2.2 \times 10^{-16}$  and  $3.041 \times 10^{-14}$ ) was found for all the mutant replicates analyzed.

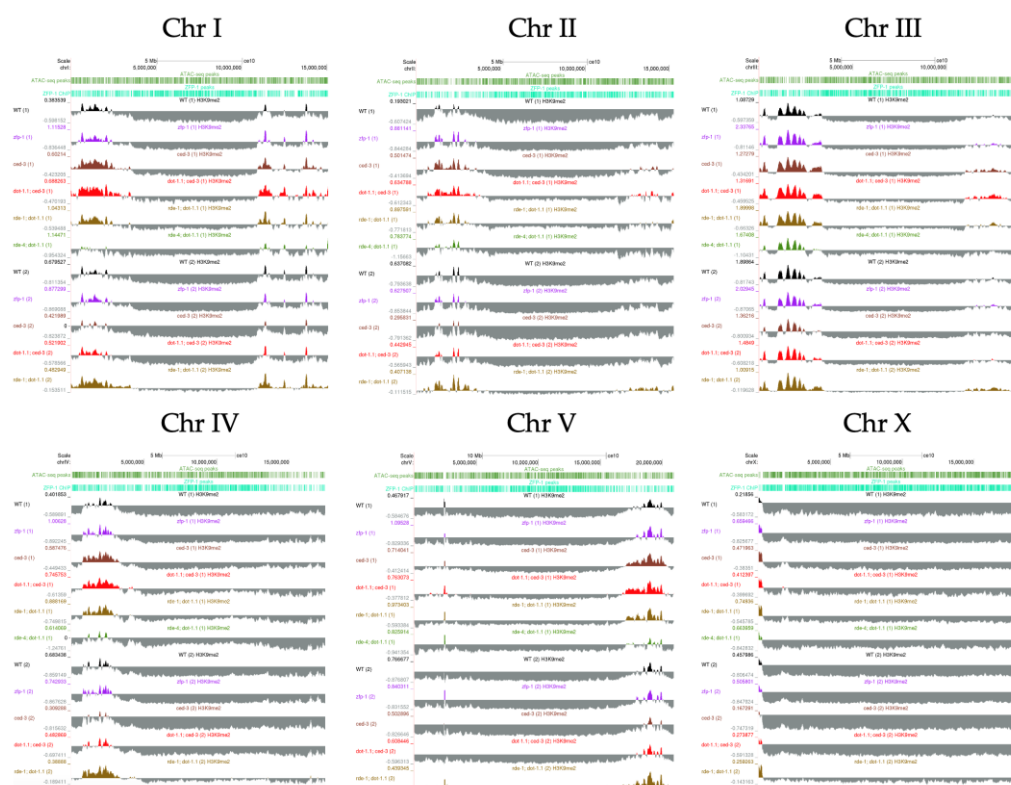

**Figure S3.** UCSC genome browser screenshots of H3K9me2 distribution along the six *C. elegans* chromosomes (not quantitative). ATAC-seq peaks: [4]. ZFP-1 peaks: modENCODE data, GEO submission GSE50301. H3K9me2 coverage tracks: our data.

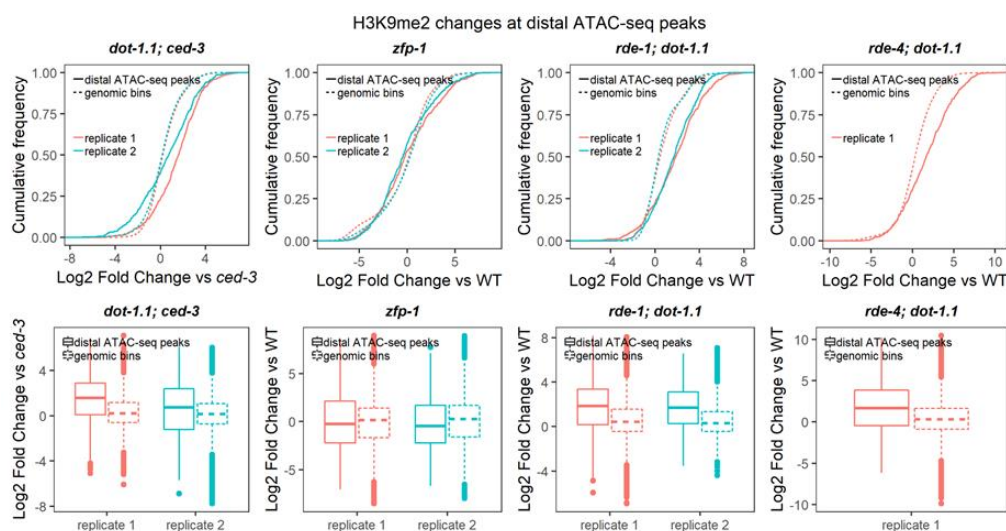

**Figure S4.** Global increase of H3K9me2 upon DOT-1.1 deletion at distal ATAC-seq peaks. Cumulative distribution of the fold change (log2) of H3K9me2 ChIP-seq RPKM value (input-normalized) at distal ATAC-seq peaks [4] between each mutant replicate and the average value in a background strain. Two-sample Kolmogorov-Smirnov (for cumulative distribution plots) and Wilcoxon rank sum (for boxplots) tests were performed to compare the cumulative changes between the distal ATAC-seq peaks and those in non-overlapping genomic bins spanning the genome. Statistical significance ( $p$ -values ranging between  $< 2.2 \times 10^{-16}$  and 0.001017) was found for all *dot-1.1; ced-3*, *rde-1; dot-1.1* and *rde-4; dot-1.1* mutant replicates analyzed, as well as for the *zfp-1* mutant, with the exception of one of the replicates (Wilcoxon  $p$ -value = 0.2521).

(a)

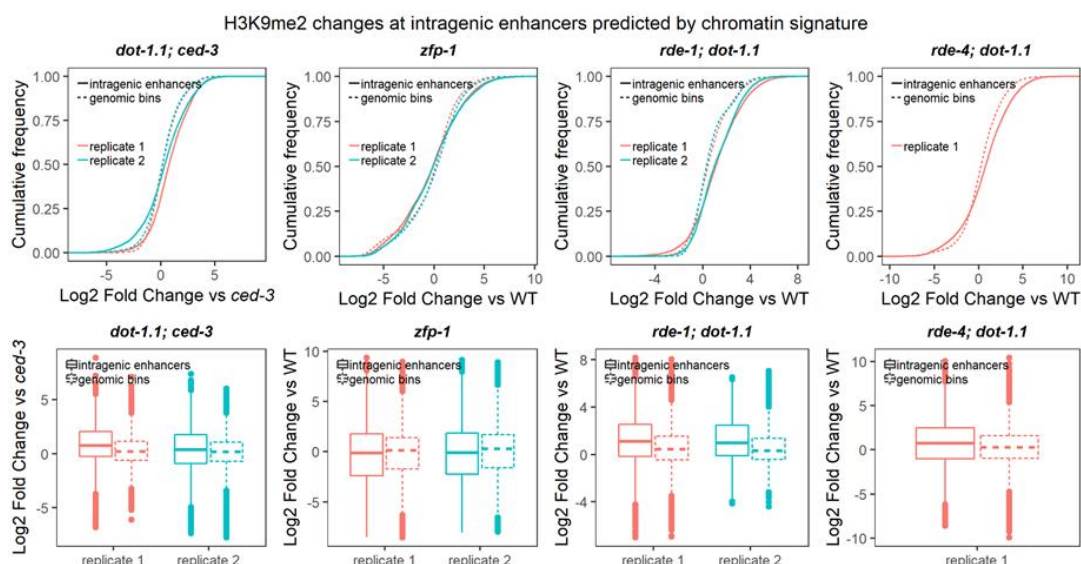

(b)

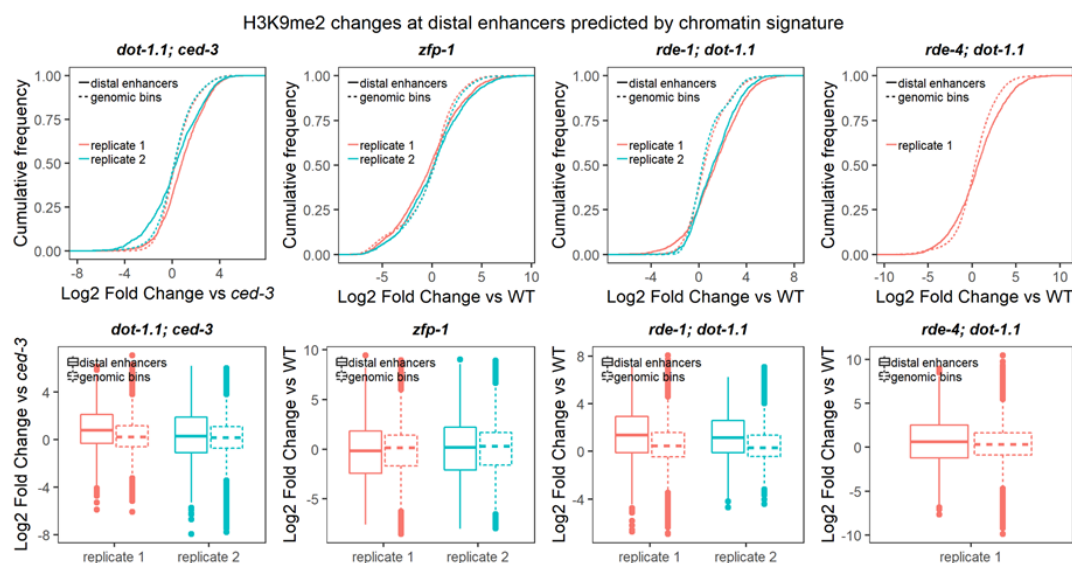

(c)

Overlap between H3K9me2-enriched intragenic enhancers between *dot-1.1; ced-3* mutant and its background strain (*ced-3*)

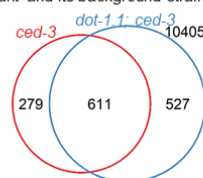

(d)

Overlap between H3K9me2-enriched distal enhancers between *dot-1.1; ced-3* mutant and its background strain (*ced-3*)

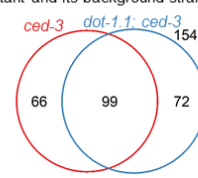

**Figure S5.** Deletion of DOT-1.1 leads to global increase in H3K9me2 at enhancers predicted by chromatin signatures. Shown are cumulative distribution plots and boxplots representing the fold change (log2) of H3K9me2 ChIP-seq RPKM value (input-normalized) at intragenic (a) and distal (b) enhancer domains [5] between each mutant replicate and the average value in the background strain. Two-sample Kolmogorov-Smirnov (for cumulative distribution plots) and Wilcoxon rank sum (for boxplots) tests were performed to compare the cumulative changes between enhancer domains and those in non-overlapping genomic bins spanning the genome. Statistical significance ( $p$ -values ranging between  $< 2.2 \times 10^{-16}$  and 0.0072) was found for all *dot-1.1; ced-3*, *rde-1; dot-1.1* and *rde-4; dot-1.1* mutant replicates analyzed, as well as for the *zfp-1* mutant for intragenic enhancers, with the exception of one of the replicates (Wilcoxon  $p$ -value = 0.1447). The Venn diagrams show that the *dot-1.1; ced-3* mutant has more intragenic (c) and distal (d) enhancers overlapping with H3K9me2 peaks (observed in both replicates, see Materials and Methods) than the background strain (*ced-3* mutant). Numbers inside the circles designate enhancers overlapping with H3K9me2 peaks in either strain alone (left-most and right-most numbers) or in both strains (middle). Numbers outside the circles representing enhancers not overlapping with H3K9me2 peaks in any strain.

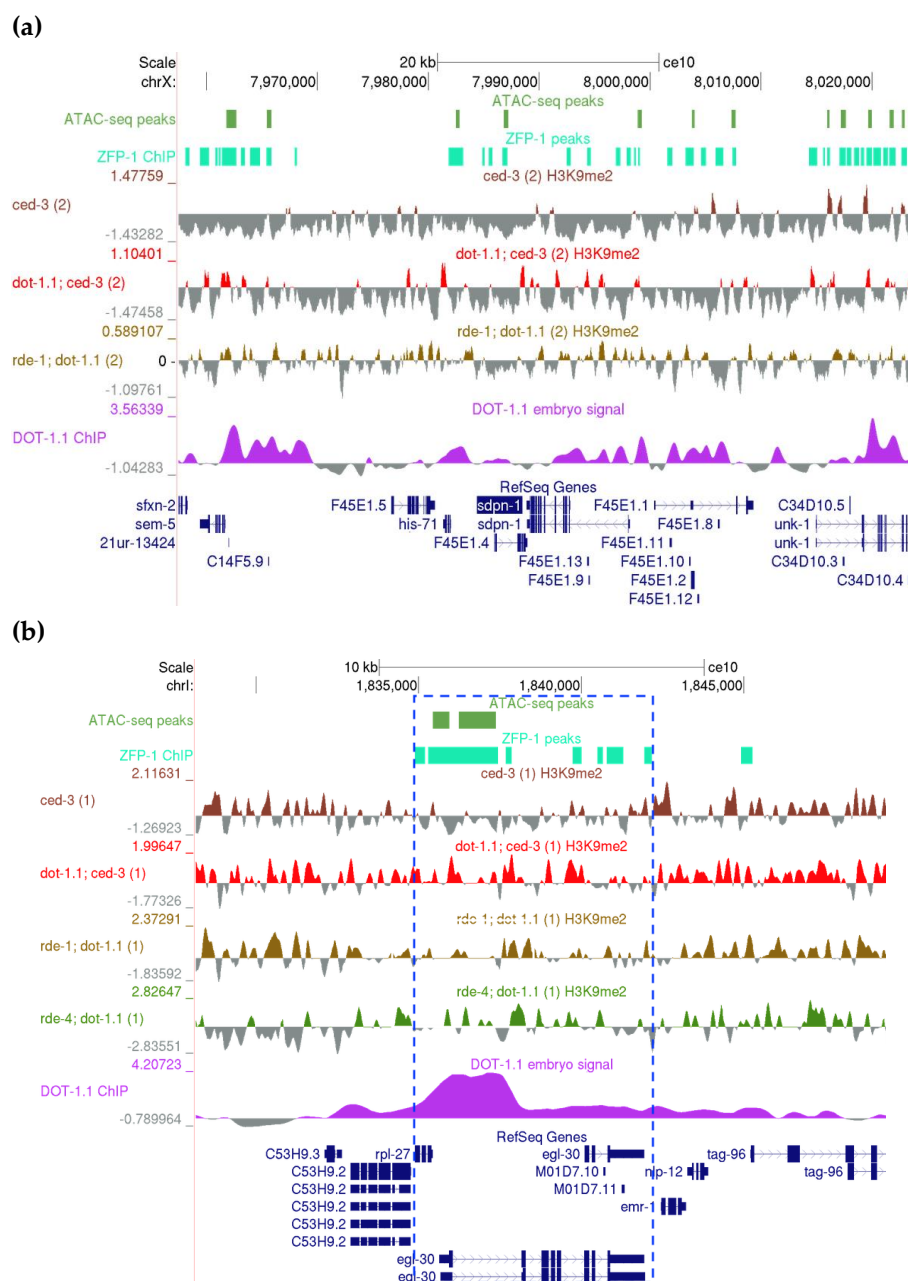

**Figure S6.** Examples of genomic loci containing developmental genes that gain H3K9me2 in the absence of DOT-1.1 (UCSC genome browser screenshots). **(a)** The ~60kb genomic region on ChrX containing many enhancers, including in the intron of the *sdpr-1* gene. **(b)** The *egl-30* locus bound by ZFP-1/DOT-1.1. ATAC-seq peaks: [4]. ZFP-1 peaks: modENCODE data, GEO submission GSE50301. H3K9me2 coverage tracks: our data. DOT-1.1 ChIP-chip signal: modENCODE data, GEO submission GSE37488.

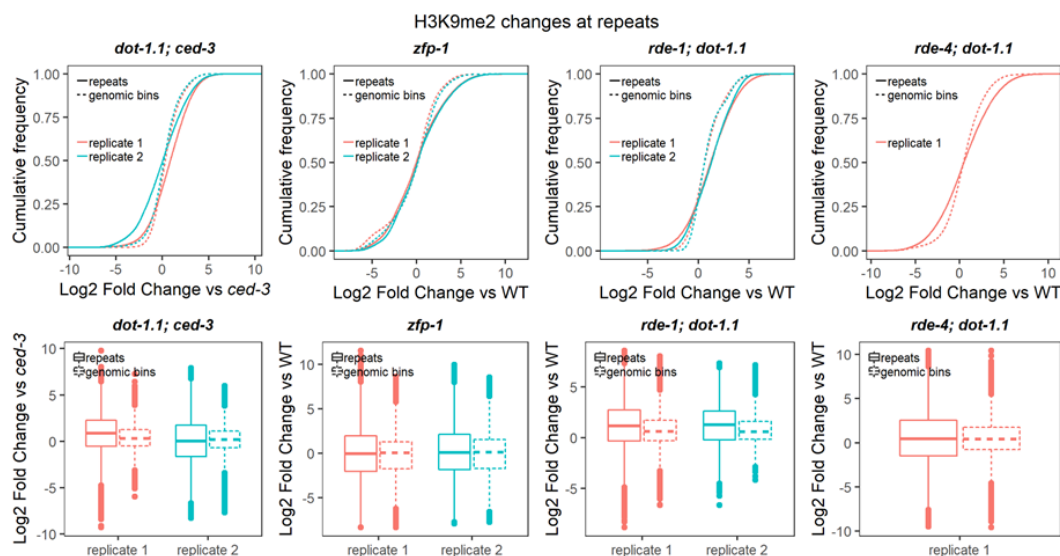

**Figure S7.** Deletion of DOT-1.1 leads to global increase in H3K9me2 at repeats. Shown are cumulative distribution plots and boxplots representing the fold change ( $\log_2$ ) of H3K9me2 ChIP-seq RPKM value (input-normalized) at genomic repeats [6] between each mutant replicate and the average value in the background strain. Two-sample Kolmogorov-Smirnov (for cumulative distribution plots) and Wilcoxon rank sum (for boxplots) tests were performed to compare the cumulative changes between genomic repeat regions and those in non-overlapping genomic bins spanning the genome. Statistical significance ( $p$ -values  $< 2.2 \times 10^{-16}$ ) was found for all *dot-1.1; ced-3* and *rde-1; dot-1.1* mutant replicates analyzed.

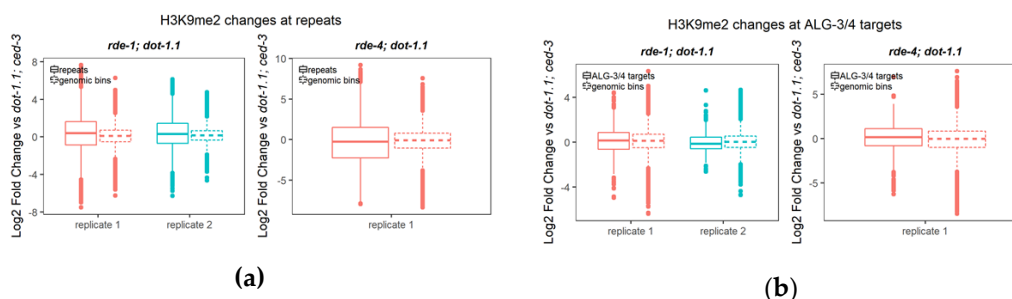

**Figure S8.** Boxplots showing cumulative changes in the fold change ( $\log_2$ ) of H3K9me2 ChIP-seq RPKM value (input-normalized) at repeats [6] (a) and ALG-3/4 targets [7] (b) between the *rde-1; dot-1.1* and *rde-4; dot-1.1* mutants and the average value in the *dot-1.1; ced-3* mutant. Wilcoxon rank sum tests were performed to compare the changes between either repeats or ALG-3/4 targets and those in non-overlapping genomic bins spanning the genome. Statistical significance ( $p$ -values ranging between  $< 2.2 \times 10^{-16}$  and  $3.47 \times 10^{-12}$ ) was found for all *rde-1; dot-1.1* and *rde-4; dot-1.1* mutant replicates analyzed.

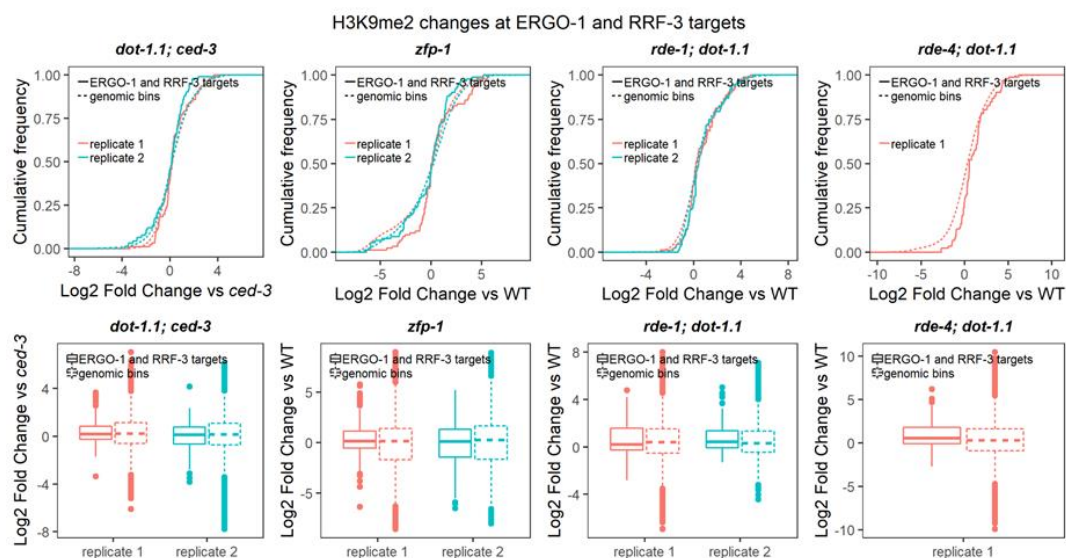

**Figure S9.** Deletion of DOT-1.1 does not significantly disrupt global H3K9me2 at ERGO-1 and RRF-3 targets. Shown are cumulative distribution plots and boxplots representing the fold change (log2) of H3K9me2 ChIP-seq RPKM value (input-normalized) at ERGO-1 and RRF-3 targets [8] between each mutant replicate and the average value in the background strain. Two-sample Kolmogorov-Smirnov (for cumulative distribution plots) and Wilcoxon rank sum (for boxplots) tests were performed to compare the cumulative changes between ERGO-1 and RRF-3 targets and those in non-overlapping genomic bins spanning the genome. Statistical significance ( $p$ -values  $< 0.002309$ ) was observed only for the *rde-4; dot-1.1* mutant.

(a)

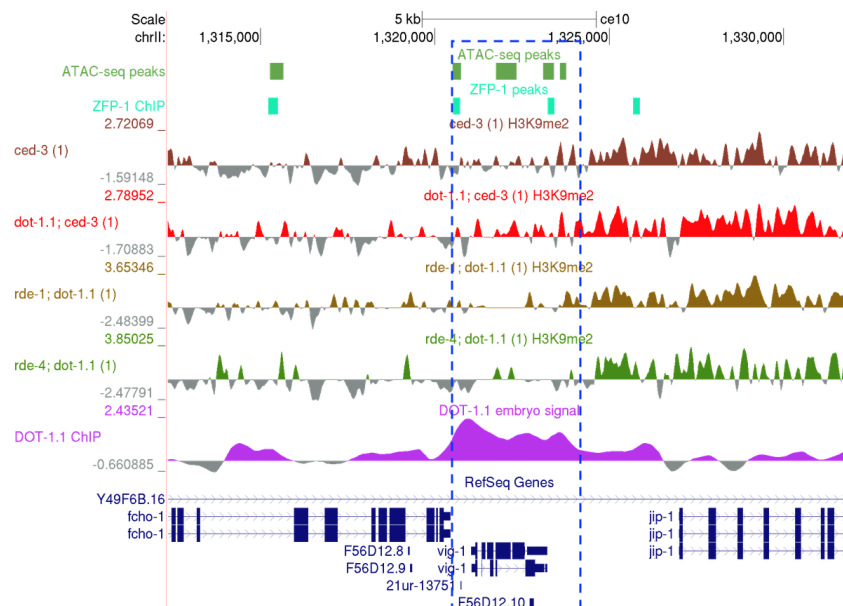

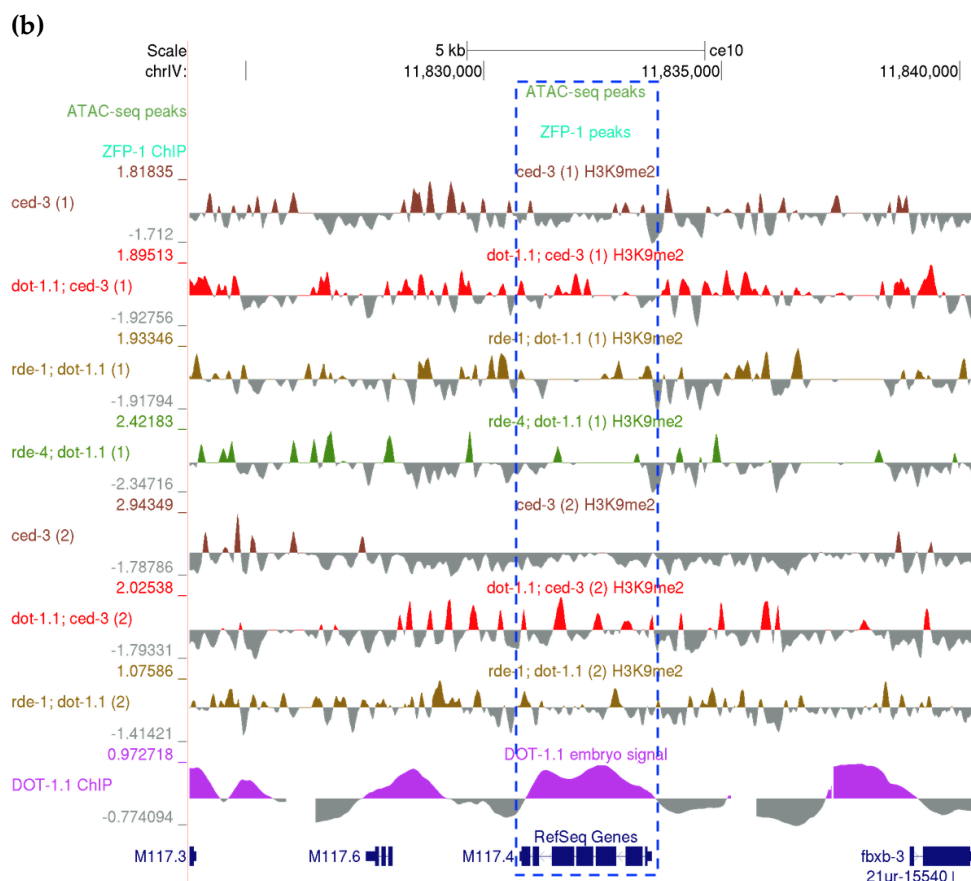

**Figure S10.** Examples of ALG-3/4 target genes that show RDE-1/4-dependent gain of H3K9me2 in the absence of DOT-1.1 (UCSC genome browser screenshots) (a) The *vig-1* gene contains intragenic enhancers. (b) The M117.4 gene is bound by DOT-1.1 in the embryo. ATAC-seq peaks: [4]. ZFP-1 peaks: modENCODE data, GEO submission GSE50301. H3K9me2 coverage tracks: our data. DOT-1.1 ChIP-chip signal: modENCODE data, GEO submission GSE37488.

## References

- Esse, R.; Gushchanskaia, E.S.; Lord, A.; Grishok, A. DOT1L complex suppresses transcription from enhancer elements and ectopic RNAi in *Caenorhabditis elegans*. *RNA* **2019**, *25*, 1259–1273.
- Cecere, G.; Hoersch, S.; Jensen, M.B.; Dixit, S.; Grishok, A. The ZFP-1(AF10)/DOT-1 complex opposes H2B ubiquitination to reduce Pol II transcription. *Mol. Cell* **2013**, *50*, 894–907.
- Rockman, M.V.; Kruglyak, L. Recombinational landscape and population genomics of *Caenorhabditis elegans*. *Plos Genet.* **2009**, *5*, e1000419.
- Daugherty, A.C.; Yeo, R.W.; Buenrostro, J.D.; Greenleaf, W.J.; Kundaje, A.; Brunet, A. (2017). Chromatin accessibility dynamics reveal novel functional enhancers in *C. elegans*. *Genome Res.* **2017**, *27*, 2096–2107.
- Evans, K.J.; Huang, N.; Stempor, P.; Chesney, M.A.; Down, T.A.; Ahringer, J. Stable *Caenorhabditis elegans* chromatin domains separate broadly expressed and developmentally regulated genes. *Proc. Natl Acad Sci Usa* **2016**, *113*, E7020–E7029.
- McMurphy, A.N.; Stempor, P.; Gaarenstroom, T.; Wysolmerski, B.; Dong, Y.; Aussanikava, D.; Appert, A.; Huang, N.; Kolasinska-Zwierz, P.; Sapetschnig, A.; et al. A team of heterochromatin factors collaborates with small RNA pathways to combat repetitive elements and germline stress. *eLife* **2017**, *6*, e21666.
- Conine, C.C.; Batista, P.J.; Gu, W.; Claycomb, J.M.; Chaves, D.A.; Shirayama, M.; and Mello, C.C. (2010). Argonautes ALG-3 and ALG-4 are required for spermatogenesis-specific 26G-RNAs and thermotolerant sperm in *Caenorhabditis elegans*. *Proc. Natl. Acad. Sci. USA* **2010**, *107*, 3588–3593.

8. Vasale, J.J.; Gu, W.; Thivierge, C.; Batista, P.J.; Claycomb, J.M.; Youngman, E.M.; Duchaine, T.F.; Mello, C.C.; Conte, D., Jr. Sequential rounds of RNA-dependent RNA transcription drive endogenous small-RNA biogenesis in the ERGO-1/Argonaute pathway. *Proc. Natl. Acad. Sci. USA* **2010**, *107*, 3582–3587.

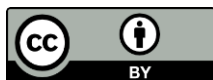

© 2020 by the authors. Licensee MDPI, Basel, Switzerland. This article is an open access article distributed under the terms and conditions of the Creative Commons Attribution (CC BY) license (<http://creativecommons.org/licenses/by/4.0/>).
